# Supplementary material
Source: PubMed Central journal article supplement (PMC7428159)
Supplement: NIHMS1594655-supplement-supplementary_material.pdf [file NIHMS1594655-supplement-supplementary_material.pdf]

# How are patient-reported outcomes and symptoms being measured in adults with relapsed/refractory multiple myeloma? A Systematic Review

## *Quality of Life Research*

Corresponding Author:  
Matthew R LeBlanc, RN  
Duke University School of Nursing  
307 Trent Drive  
Durham NC 27710  
[matthew.leblanc@duke.edu](mailto:matthew.leblanc@duke.edu)  
(508)736-6807  
ORCID: 0000-0002-1270-3825

Rachel Hirschey, PhD, RN,  
University of North Carolina Chapel Hill School of Nursing  
Carrington Hall, Campus Box #7460  
Chapel Hill, NC 27599

Ashley Leak Bryant, PhD, RN  
University of North Carolina Chapel Hill School of Nursing  
Carrington Hall, Campus Box #7460  
Chapel Hill, NC 27599

Thomas W. LeBlanc MD  
Duke University School of Medicine  
8 Searle Center Drive  
Durham NC 27710

Sophia K. Smith, PhD, MSW  
Duke University School of Nursing  
307 Trent Drive  
Durham NC 27710

**Table S1.** Full Search Strategy, Searched: 11/20/18

| PubMED   |                                                                                                                                                                                                                                                                                                                                                                                                                                                                                                                                                                                                                                                                                                                                                                                                                                                                                                                                                                                                                                                                                                                                                                                                                                                                                                                                                                                                                                                 |           |
|----------|-------------------------------------------------------------------------------------------------------------------------------------------------------------------------------------------------------------------------------------------------------------------------------------------------------------------------------------------------------------------------------------------------------------------------------------------------------------------------------------------------------------------------------------------------------------------------------------------------------------------------------------------------------------------------------------------------------------------------------------------------------------------------------------------------------------------------------------------------------------------------------------------------------------------------------------------------------------------------------------------------------------------------------------------------------------------------------------------------------------------------------------------------------------------------------------------------------------------------------------------------------------------------------------------------------------------------------------------------------------------------------------------------------------------------------------------------|-----------|
| 1        | "multiple myeloma"[MeSH] OR myeloma[tiab] OR Myelomas[tiab] OR Myelomatosis[tiab] OR Myelomatoses[tiab] OR "Kahler Disease"[tiab]                                                                                                                                                                                                                                                                                                                                                                                                                                                                                                                                                                                                                                                                                                                                                                                                                                                                                                                                                                                                                                                                                                                                                                                                                                                                                                               | 56,468    |
| 2        | "Recurrence"[Mesh] OR "Neoplasm Recurrence, Local"[Mesh] OR "Retreatment"[Mesh] OR relapse[tiab] OR relapses[tiab] OR "Relapsed"[TIAB] OR "refractory"[TIAB] OR "RRMM"[TIAB] OR recurrence[tiab] OR recurrences[tiab] OR recurred[tiab] OR retreatment[tiab] OR retreated[tiab]                                                                                                                                                                                                                                                                                                                                                                                                                                                                                                                                                                                                                                                                                                                                                                                                                                                                                                                                                                                                                                                                                                                                                                 | 667493    |
| 3        | "quality of life"[MeSH] OR "quality of life"[tiab] OR "life quality"[tiab] OR "well being"[tiab] OR "well-being"[tiab] OR "health status"[mesh] OR "health status"[tiab] OR "function"[TIAB] OR "functional"[TIAB] OR "signs and symptoms"[Mesh] OR "symptoms"[tiab] OR symptom[TIAB] OR symptomatic[TIAB] OR "nausea"[tiab] OR "nauseous"[tiab] OR "vomiting"[tiab] OR "constipation"[tiab] OR "diarrhea"[tiab] OR "diarrhoea"[tiab] OR "shortness of breath"[TIAB] OR dyspnea[TIAB] OR "peripheral neuropathy"[tiab] OR "peripheral neuropathies"[tiab] OR "cognition"[MeSH] OR "cognition"[TIAB] OR cognitive[tiab] OR "memory"[MeSH] OR "memory"[TIAB] OR "pain"[tiab] OR "insomnia"[tiab] OR "sleep disturbance"[tiab] OR "Fatigue"[tiab] OR "anxiety"[Mesh] OR "anxiety"[tiab] OR "anxieties"[tiab] OR "anxious"[tiab] OR "nervousness"[tiab] OR "depression"[Mesh] OR "depression"[tiab] OR "depressions"[tiab] OR "depressive"[tiab] OR "depressed"[tiab] OR distress[tiab] OR burden[tiab] OR "stress, psychological"[Mesh] OR stress[tiab] OR stresses[tiab] OR suffering[tiab]                                                                                                                                                                                                                                                                                                                                                       | 6950707   |
| 4        | #1 AND #2 AND #3                                                                                                                                                                                                                                                                                                                                                                                                                                                                                                                                                                                                                                                                                                                                                                                                                                                                                                                                                                                                                                                                                                                                                                                                                                                                                                                                                                                                                                | 1760      |
| 5        | #4 NOT (Editorial[ptyp] OR Letter[ptyp] OR Case Reports[ptyp] OR Comment[ptyp]) NOT (animals[mh] NOT humans[mh]) NOT ("Adolescent"[Mesh] OR "Child"[Mesh] OR "Infant"[Mesh]) NOT "Adult"[Mesh]) AND English[lang] AND ("2003/01/01"[PDAT] : "2018/12/31"[PDAT])                                                                                                                                                                                                                                                                                                                                                                                                                                                                                                                                                                                                                                                                                                                                                                                                                                                                                                                                                                                                                                                                                                                                                                                 | 1033      |
| CINAHL   |                                                                                                                                                                                                                                                                                                                                                                                                                                                                                                                                                                                                                                                                                                                                                                                                                                                                                                                                                                                                                                                                                                                                                                                                                                                                                                                                                                                                                                                 |           |
| 1        | (MH "multiple myeloma") OR TI (myeloma OR Myelomas OR Myelomatosis OR Myelomatoses OR "Kahler Disease") OR AB (myeloma OR Myelomas OR Myelomatosis OR Myelomatoses OR "Kahler Disease")                                                                                                                                                                                                                                                                                                                                                                                                                                                                                                                                                                                                                                                                                                                                                                                                                                                                                                                                                                                                                                                                                                                                                                                                                                                         | 7113      |
| 2        | (MH "recurrence") OR (MH "Neoplasm Recurrence, Local") OR TI (relapse OR relapses OR Relapsed OR refractory OR RRMM OR recurrence OR recurrences OR recurred OR retreatment OR retreated) OR AB (relapse OR relapses OR Relapsed OR refractory OR RRMM OR recurrence OR recurrences OR recurred OR retreatment OR retreated)                                                                                                                                                                                                                                                                                                                                                                                                                                                                                                                                                                                                                                                                                                                                                                                                                                                                                                                                                                                                                                                                                                                    | 108,471   |
| 3        | (MH "quality of life+") OR (MH "symptoms+") OR (MH cognition+) OR (MH memory+) OR (MH "Anxiety+") OR (MH "depression+") OR (MH "stress, psychological+") OR (MH "health status+") OR TI ("quality of life" OR "life quality" OR "well being" OR "well-being" OR "health status" OR function OR functional OR symptoms OR symptom OR symptomatic OR nausea OR "nauseous" OR "vomiting" OR "constipation" OR "diarrhea" OR "diarrhoea" OR dyspnea OR "shortness of breath" OR "peripheral neuropathy" OR "peripheral neuropathies" OR cognition OR cognitive OR memory OR "pain" OR "insomnia" OR "sleep disturbance" OR "Fatigue" OR "anxiety" OR "anxieties" OR "anxious" OR "nervousness" OR "depression" OR "depressions" OR "depressive" OR "depressed" OR distress OR "stress" OR "stresses" OR "suffering") OR AB ("quality of life" OR "life quality" OR "well being" OR "well-being" OR "health status" OR function OR functional OR symptoms OR symptom OR symptomatic OR nausea OR "nauseous" OR "vomiting" OR "constipation" OR "diarrhea" OR "diarrhoea" OR dyspnea OR "shortness of breath" OR "peripheral neuropathy" OR "peripheral neuropathies" OR cognition OR cognitive OR memory OR "Pain" OR "insomnia" OR "sleep disturbance" OR "Fatigue" OR "anxiety" OR "anxieties" OR "anxious" OR "nervousness" OR "depression" OR "depressions" OR "depressive" OR "depressed" OR distress OR "stress" OR "stresses" OR "suffering") | 1,143,138 |
| 4        | #1 AND #2 AND #3                                                                                                                                                                                                                                                                                                                                                                                                                                                                                                                                                                                                                                                                                                                                                                                                                                                                                                                                                                                                                                                                                                                                                                                                                                                                                                                                                                                                                                | 299       |
| 5        | 2003 – 2018, English                                                                                                                                                                                                                                                                                                                                                                                                                                                                                                                                                                                                                                                                                                                                                                                                                                                                                                                                                                                                                                                                                                                                                                                                                                                                                                                                                                                                                            | 289       |
| PsycINFO |                                                                                                                                                                                                                                                                                                                                                                                                                                                                                                                                                                                                                                                                                                                                                                                                                                                                                                                                                                                                                                                                                                                                                                                                                                                                                                                                                                                                                                                 |           |
| 1        | TI (myeloma OR Myelomas OR Myelomatosis OR Myelomatoses OR "Kahler Disease") OR AB (myeloma OR Myelomas OR Myelomatosis OR Myelomatoses OR "Kahler Disease")                                                                                                                                                                                                                                                                                                                                                                                                                                                                                                                                                                                                                                                                                                                                                                                                                                                                                                                                                                                                                                                                                                                                                                                                                                                                                    | 256       |
| 2        | DE "Relapse (Disorders)" OR TI (relapse OR relapses OR Relapsed OR refractory OR RRMM OR recurrence OR recurrences OR recurred OR retreatment OR retreated) OR AB (relapse OR relapses OR Relapsed OR refractory OR RRMM OR recurrence OR recurrences OR recurred OR retreatment OR retreated)                                                                                                                                                                                                                                                                                                                                                                                                                                                                                                                                                                                                                                                                                                                                                                                                                                                                                                                                                                                                                                                                                                                                                  | 41,485    |
| 3        | DE "quality of life" OR DE "Symptoms" OR DE "Psychiatric Symptoms" OR DE "Mental Disorders due to General Medical Conditions" OR DE cognition OR DE memory OR DE Anxiety OR DE "Depression (Emotion)" OR DE stress OR TI ("quality of life" OR "life quality" OR "well being" OR "well-being" OR "health status" OR function OR functional OR symptoms OR symptom OR symptomatic OR nausea OR "nauseous" OR "vomiting" OR "constipation" OR "diarrhea" OR "diarrhoea" OR dyspnea OR shortness of breath OR "peripheral neuropathy" OR "peripheral neuropathies" OR cognition OR cognitive OR memory OR "Pain" OR "insomnia" OR "sleep disturbance" OR "Fatigue" OR "anxiety" OR "anxieties" OR "anxious" OR "nervousness" OR "depression" OR "depressions" OR "depressive" OR "depressed" OR distress OR "stress" OR "stresses" OR "suffering") OR AB ("quality of life" OR "life                                                                                                                                                                                                                                                                                                                                                                                                                                                                                                                                                               | 1,630,394 |

|        |                                                                                                                                                                                                                                                                                                                                                                                                                                                                                                                                                                                                                                                                                                                                                                                                                                                                                                                                                                                                                                                                                                                                                                                                                                                                                                                                                                                                                                                                                                                                                                                                                                                                                                         |           |
|--------|---------------------------------------------------------------------------------------------------------------------------------------------------------------------------------------------------------------------------------------------------------------------------------------------------------------------------------------------------------------------------------------------------------------------------------------------------------------------------------------------------------------------------------------------------------------------------------------------------------------------------------------------------------------------------------------------------------------------------------------------------------------------------------------------------------------------------------------------------------------------------------------------------------------------------------------------------------------------------------------------------------------------------------------------------------------------------------------------------------------------------------------------------------------------------------------------------------------------------------------------------------------------------------------------------------------------------------------------------------------------------------------------------------------------------------------------------------------------------------------------------------------------------------------------------------------------------------------------------------------------------------------------------------------------------------------------------------|-----------|
|        | quality" OR "well being" OR "well-being" OR "health status" OR function OR functional OR symptoms OR symptom OR symptomatic OR nausea OR "nauseous" OR "vomiting" OR "constipation" OR "diarrhea" OR "diarrhoea" OR dyspnea OR shortness of breath OR "peripheral neuropathy" OR "peripheral neuropathies" OR cognition OR cognitive OR memory OR "Pain" OR "insomnia" OR "sleep disturbance" OR "Fatigue" OR "anxiety" OR "anxieties" OR "anxious" OR "nervousness" OR "depression" OR "depressions" OR "depressive" OR "depressed" OR distress OR "stress" OR "stresses" OR "suffering")                                                                                                                                                                                                                                                                                                                                                                                                                                                                                                                                                                                                                                                                                                                                                                                                                                                                                                                                                                                                                                                                                                              |           |
| 4      | #1 AND #2 AND #3                                                                                                                                                                                                                                                                                                                                                                                                                                                                                                                                                                                                                                                                                                                                                                                                                                                                                                                                                                                                                                                                                                                                                                                                                                                                                                                                                                                                                                                                                                                                                                                                                                                                                        | 10        |
| 5      | #4 AND 2003 – 2018, English                                                                                                                                                                                                                                                                                                                                                                                                                                                                                                                                                                                                                                                                                                                                                                                                                                                                                                                                                                                                                                                                                                                                                                                                                                                                                                                                                                                                                                                                                                                                                                                                                                                                             | 10        |
| EMBASE |                                                                                                                                                                                                                                                                                                                                                                                                                                                                                                                                                                                                                                                                                                                                                                                                                                                                                                                                                                                                                                                                                                                                                                                                                                                                                                                                                                                                                                                                                                                                                                                                                                                                                                         |           |
| 1      | 'multiple myeloma'/exp OR myeloma:ti,ab OR Myelomas:ti,ab OR Myelomatosis:ti,ab OR Myelomatoses:ti,ab OR 'Kahler Disease':ti,ab                                                                                                                                                                                                                                                                                                                                                                                                                                                                                                                                                                                                                                                                                                                                                                                                                                                                                                                                                                                                                                                                                                                                                                                                                                                                                                                                                                                                                                                                                                                                                                         | 95,727    |
| 2      | relapse/exp OR relapse:ti,ab OR relapses:ti,ab OR relapsed:ti,ab OR 'recurrence'/exp OR recurrence:ti,ab OR refractory:ti,ab OR RRMM:ti,ab OR recurrence:ti,ab OR recurrences:ti,ab OR recurred:ti,ab OR retreatment:ti,ab OR retreated:ti,ab                                                                                                                                                                                                                                                                                                                                                                                                                                                                                                                                                                                                                                                                                                                                                                                                                                                                                                                                                                                                                                                                                                                                                                                                                                                                                                                                                                                                                                                           | 935099    |
| 3      | 'quality of life'/exp OR 'symptoms'/exp OR 'nausea'/exp OR 'vomiting'/exp OR 'diarrhea'/exp OR 'constipation'/exp OR 'pain'/exp OR 'peripheral neuropathy'/exp OR 'cognition'/exp OR 'memory'/exp OR 'dyspnea'/exp OR 'insomnia'/exp OR 'sleep disorder'/exp OR 'fatigue'/exp OR 'anxiety'/exp OR 'depression'/exp OR 'distress syndrome'/exp OR 'health status'/exp OR 'quality of life':ti,ab OR 'life quality':ti,ab OR 'well being':ti,ab OR 'well-being':ti,ab OR 'health status':ti,ab OR 'function':ti,ab OR 'functional':ti,ab OR 'symptoms':ti,ab OR symptom:ti,ab OR symptomatic:ti,ab OR 'nausea':ti,ab OR 'nauseous':ti,ab OR 'vomiting':ti,ab OR 'constipation':ti,ab OR 'diarrhea':ti,ab OR 'diarrhoea':ti,ab OR 'dyspnea':ti,ab OR 'shortness of breath':ti,ab OR 'peripheral neuropathy':ti,ab OR 'peripheral neuropathies':ti,ab OR 'cognition':ti,ab OR cognitive:ti,ab OR 'memory':ti,ab OR 'Pain':ti,ab OR 'insomnia':ti,ab OR 'sleep disturbance':ti,ab OR 'sleep disorder':ti,ab OR 'Fatigue':ti,ab OR 'anxiety':ti,ab OR 'anxieties':ti,ab OR 'anxious':ti,ab OR 'nervousness':ti,ab OR 'depression':ti,ab OR 'depressions':ti,ab OR 'depressive':ti,ab OR 'depressed':ti,ab OR 'distress':ti,ab OR 'stress':ti,ab OR 'stresses':ti,ab OR 'suffering':ti,ab                                                                                                                                                                                                                                                                                                                                                                                                                      | 9,392,792 |
| 4      | #1 AND #2 AND #3                                                                                                                                                                                                                                                                                                                                                                                                                                                                                                                                                                                                                                                                                                                                                                                                                                                                                                                                                                                                                                                                                                                                                                                                                                                                                                                                                                                                                                                                                                                                                                                                                                                                                        | 6,510     |
| 5      | #4 AND (2003:py OR 2004:py OR 2005:py OR 2006:py OR 2007:py OR 2008:py OR 2009:py OR 2010:py OR 2011:py OR 2012:py OR 2013:py OR 2014:py OR 2015:py OR 2016:py OR 2017:py OR 2018:py) AND ('article'/it OR 'article in press'/it OR 'chapter'/it OR 'conference paper'/it OR 'erratum'/it OR 'note'/it OR 'short survey'/it)                                                                                                                                                                                                                                                                                                                                                                                                                                                                                                                                                                                                                                                                                                                                                                                                                                                                                                                                                                                                                                                                                                                                                                                                                                                                                                                                                                            | 1,891     |
| SCOPUS |                                                                                                                                                                                                                                                                                                                                                                                                                                                                                                                                                                                                                                                                                                                                                                                                                                                                                                                                                                                                                                                                                                                                                                                                                                                                                                                                                                                                                                                                                                                                                                                                                                                                                                         |           |
| 1      | <p>myeloma OR Myelomas OR "Myelomatosis" OR "Myelomatoses" OR "Kahler Disease" 78,182</p> <p>Recurrence OR Retreatment OR relapse OR relapses OR Relapsed OR refractory OR RRMM OR recurrences OR recurred OR retreated 890,612</p> <p>"quality of life" OR "life quality" OR "well being" OR OR "health status" OR "function" OR "functional" OR symptoms OR symptom OR symptomatic OR nausea OR nauseous OR vomiting OR constipation OR diarrhea OR diarrhoea OR "shortness of breath" OR dyspnea OR "peripheral neuropathy" OR "peripheral neuropathies" OR cognition OR cognitive OR memory OR pain OR insomnia OR "sleep disturbance" OR fatigue OR anxiety OR anxieties OR anxious OR nervousness OR depression OR depressions OR depressive OR depressed OR distress OR burden OR "stress, psychological" OR stress OR stresses OR suffering 13,959,874</p> <p>1 &amp; 2 &amp; 3 3,978</p> <p>( LIMIT-TO ( PUBYEAR , 2018 ) OR LIMIT-TO ( PUBYEAR , 2017 ) OR LIMIT-TO ( PUBYEAR , 2016 ) OR LIMIT-TO ( PUBYEAR , 2015 ) OR LIMIT-TO ( PUBYEAR , 2014 ) OR LIMIT-TO ( PUBYEAR , 2013 ) OR LIMIT-TO ( PUBYEAR , 2012 ) OR LIMIT-TO ( PUBYEAR , 2011 ) OR LIMIT-TO ( PUBYEAR , 2010 ) OR LIMIT-TO ( PUBYEAR , 2009 ) OR LIMIT-TO ( PUBYEAR , 2008 ) OR LIMIT-TO ( PUBYEAR , 2007 ) OR LIMIT-TO ( PUBYEAR , 2006 ) OR LIMIT-TO ( PUBYEAR , 2005 ) OR LIMIT-TO ( PUBYEAR , 2004 ) OR LIMIT-TO ( PUBYEAR , 2003 ) ) AND ( LIMIT-TO ( LANGUAGE , "English" ) ) AND ( LIMIT-TO ( DOCTYPE , "ar" ) OR LIMIT-TO ( DOCTYPE , "cp" ) OR LIMIT-TO ( DOCTYPE , "sh" ) OR LIMIT-TO ( DOCTYPE , "no" ) OR LIMIT-TO ( DOCTYPE , "ch" ) OR LIMIT-TO ( DOCTYPE , "ip" ) OR LIMIT-TO ( DOCTYPE , "er" ) ) 2,203</p> | 2,203     |

**Table S2.** CONSORT PRO Extension checklist scoring rubric

|                                                                                                                                              | CONSORT 2010                                                                                                                                          | PRO ADDENDUMS (Calvert 2013)                                                                                                                                 | SCORING RUBRIC (1 if met, 0 if not met)                                                                                  | NOTES                                                                                                                                                                |
|----------------------------------------------------------------------------------------------------------------------------------------------|-------------------------------------------------------------------------------------------------------------------------------------------------------|--------------------------------------------------------------------------------------------------------------------------------------------------------------|--------------------------------------------------------------------------------------------------------------------------|----------------------------------------------------------------------------------------------------------------------------------------------------------------------|
| ABSTRACT                                                                                                                                     | 1b Structured summary of trial design, methods, results and conclusions                                                                               | EXTENSION: The PRO should be identified in the abstract as a primary or secondary outcome                                                                    | 1. PRO identified in abstract as primary or secondary outcome                                                            | Mention of PRO instrument or concept only assessable by PRO e.g. pain, or QoL. CIPN doesn't count as it is frequently assessed by clinician report                   |
| INTRODUCTION                                                                                                                                 | 2a Scientific background and explanation of rationale                                                                                                 | ELABORATION: The relevant background and rationale for why PROs were assessed in the RCT should be briefly described                                         | 2. Background and rationale for PRO assessment                                                                           | Mere mention of PRO or concept doesn't count. Must be justified in the context of the study.                                                                         |
|                                                                                                                                              | 2b Specific Objectives and hypotheses.                                                                                                                | EXTENSION: The PROs hypothesis should be stated, and relevant domains identified if applicable                                                               | 3. PRO hypothesis stated                                                                                                 |                                                                                                                                                                      |
| METHODS                                                                                                                                      | 6a Completely define prescribed primary and secondary outcome measures, including how and when they were assessed                                     | EXTENSION: Evidence of PRO validity and reliability should be provided or cited if available                                                                 | 5. Present evidence and/or reference of reliability and validity for PRO instruments                                     | Evidence provided in text w/ reference and/or validity/ reliability mentioned and referenced and/or instrument referenced and reference details validity/reliability |
|                                                                                                                                              |                                                                                                                                                       | ELABORATION: Details of the mode of PRO completion (who completes PRO) and the method of data collection                                                     | 6. Person completing PRO specified                                                                                       | Participant or proxy                                                                                                                                                 |
|                                                                                                                                              |                                                                                                                                                       |                                                                                                                                                              | 7. Mode of administration specified                                                                                      | Paper, interview, telephone, electronic device etc.                                                                                                                  |
|                                                                                                                                              | 12a Statistical methods used to compare groups for primary and secondary outcomes                                                                     | EXTENSION: Statistical approaches for dealing with missing data should be explicitly stated for PROs prespecified as primary or important secondary outcomes | 8. Assessment timepoints specified                                                                                       | Cross-sectional studies awarded 1 point, if met for the single timepoint                                                                                             |
|                                                                                                                                              |                                                                                                                                                       |                                                                                                                                                              | 9. Statistical methods for analyzing PRO data specified                                                                  |                                                                                                                                                                      |
|                                                                                                                                              |                                                                                                                                                       |                                                                                                                                                              | 10. Statistical approaches for missing data specified                                                                    |                                                                                                                                                                      |
| 13a For each group the numbers of participants who were randomly assigned, received intended treatment and were analyzed for primary outcome | ELABORATION: The number of participants reported PRO data at baseline and at subsequent timepoints should be made transparent                         | 11. Number of PRO participants at each timepoint reported                                                                                                    | Cross-sectional studies awarded 1 point, if met for the single timepoint                                                 |                                                                                                                                                                      |
| RESULTS                                                                                                                                      | 15 A table showing baseline demographic and clinical characteristics for each group                                                                   | ELABORATION: Included baseline data when collected                                                                                                           | 12. Baseline PRO data reported                                                                                           | In text, table or figure.                                                                                                                                            |
|                                                                                                                                              | 17a For each primary and secondary outcome, results for each group, and the estimated effect size and its precision (such as 95% confidence interval) | ELABORATION: For multidimensional PROs results from each domain and timepoint                                                                                | 13. PRO results for all domains reported                                                                                 | May not be every domain in the instrument if a subset was identified as domains of interest                                                                          |
| DISCUSSION                                                                                                                                   | 20 Trial limitations, addressing sources of bias, imprecision, and, if relevant, multiplicity of analyses.<br>21 Generalizability of trial findings   | EXTENSION: PRO-specific limitations and implications for generalizability of study findings and clinical practice                                            | 14. PRO specific limitations and implications for generalizability and clinical practice                                 | Potential sources of bias in PRO: High levels of missing data, Knowledge of tx arm in open label studies.                                                            |
|                                                                                                                                              | 22 Interpretation Consistent with results, balancing benefits, and harms, and considering other relevant evidence                                     | ELABORATION: Patient reported outcome data should be interpreted in relation to clinical outcomes including survival data where relevant                     | 15. Patient reported outcome data is interpreted in relation to clinical outcomes including survival data where relevant |                                                                                                                                                                      |
